# Supplementary material for: Factors of balance determining the risk of falls in physically active women aged over 50 years
Source: PeerJ. 2022 Feb 15;10:e12952. doi: 10.7717/peerj.12952 (PMC8855720; doi:10.7717/peerj.12952)
Supplement: Supplemental Information 1 [file peerj-10-12952-s001.xlsx]

## Sheet: DS 292
Subject	Age	Body mass	Body height	OSI EO 1	OSI EO 2	OSI EO 3	OSI EO 4	OSI EO X	APSI EO 1	APSI EO2	APSI EO 3	APSI EO 4	APSI EO X	MLSI EO 1	MLSI EO 2	MLSI EO 3	MLSI EO 4	MLSI EO X	OSI EC 1	OSI EC 2	OSI EC 3	OSI EC 4	OSI EC X	APSI EC 1	APSI EC 2	APSI EC 3	APSI EC 4	APSI EC X	MLSI EC 1	MLSI EC 2	MLSI EC 3	MLSI EC 4	MLSI EC X	FRI 1	FRI 2	FRI 3	FRI 4	FRI X
1	74	58.6	157	0.9	0.5	0.5	0.3	0.55	0.7	0.3	0.4	0.4	0.45	0.4	0.1	0.2	0.1	0.2	2.7	1.5	1.6	1.4	1.8	1.5	1	1.1	1	1.15	2.1	1	1.3	1.1	1.375	4.2	1.3	1.5	1.3	2.075
2	67	57.6	154	0.2	0.3	0.4	0.3	0.3	0.1	0.3	0.4	0.1	0.225	0.1	0.1	0.1	0.3	0.15	2.2	1.6	0.8	0.9	1.375	0.7	1	0.3	0.5	0.625	2	1.2	0.3	0.7	1.05	3.2	0.8	2.2	2.3	2.125
3	66	74	156	0.4	0.2	0.3	0.3	0.3	0.3	0.2	0.4	0.2	0.275	0.2	0.1	0.3	0.2	0.2	1.3	0.5	0.7	0.6	0.775	1.2	0.5	0.8	0.5	0.75	0.4	0.2	0.3	0.3	0.3	1.2	1.9	1.4	1.1	1.4
4	68	61	165	0.3	0.4	0.4	0.3	0.35	0.3	0.3	0.4	0.3	0.325	0.1	0.1	0.1	0.1	0.1	1.2	1.8	1.4	1.1	1.375	1	1.7	1.4	0.8	1.225	0.4	0.4	0.5	0.5	0.45	1.9	1.2	1.1	1.1	1.325
5	72	69.2	163	0.7	0.7	0.6	0.5	0.625	0.5	0.5	0.4	0.5	0.475	0.4	0.4	0.6	0.4	0.45	1.7	1.8	1.6	1.5	1.65	0.8	1.3	1.1	0.8	1	1.3	1	1.2	1	1.125	3	3.8	2.8	2.4	3
6	61	78	166	0.3	0.3	0.3	0.3	0.3	0.1	0.1	0.1	0.1	0.1	0.2	0.2	0.2	0.2	0.2	0.8	1.5	1.2	1	1.125	0.3	0.3	0.4	0.3	0.325	0.7	1.5	1.2	0.7	1.025	1.6	2.5	1.9	1.7	1.925
7	69	69	159	0.4	0.3	0.5	0.4	0.4	0.3	0.3	0.4	0.3	0.325	0.3	0.1	0.2	0.1	0.175	1.5	0.7	0.8	0.6	0.9	0.7	0.5	0.5	0.5	0.55	1.2	0.3	0.8	0.4	0.675	1.9	1.4	1.4	1.1	1.45
8	64	57	159	0.6	0.5	0.3	0.3	0.425	0.4	0.4	0.2	0.2	0.3	0.3	0.3	0.2	0.2	0.25	2.3	1.5	1.1	1	1.475	1	0.6	0.4	0.4	0.6	1.8	1.2	0.8	0.7	1.125	1.5	1.5	1.3	1.1	1.35
9	68	69.3	150	0.5	0.9	0.8	0.5	0.675	0.4	0.6	0.5	0.4	0.475	0.3	0.4	0.5	0.3	0.375	3	0.9	1.7	1	1.65	2.9	0.6	1.9	0.8	1.55	0.7	0.4	0.5	0.5	0.525	3.9	2.6	2.4	2.1	2.75
10	76	65	160	0.3	0.8	0.6	0.4	0.525	0.2	0.8	0.7	0.4	0.525	0.1	0.2	0.2	0.1	0.15	3.1	3.5	2.9	2.7	3.05	2.9	3.5	3	2.6	3	1.1	0.7	0.7	0.7	0.8	7.4	5.9	5.6	4.6	5.875
11	64	58.4	161	0.5	0.3	0.4	0.3	0.375	0.4	0.3	0.3	0.3	0.325	0.1	0.1	0.1	0.2	0.125	0.8	0.5	0.7	0.4	0.6	0.3	0.4	0.4	0.3	0.35	0.6	0.3	0.3	0.3	0.375	2.6	2.9	2.2	1.9	2.4
12	69	62	161	0.3	0.4	0.4	0.4	0.375	0.2	0.3	0.2	0.2	0.225	0.1	0.2	0.2	0.2	0.175	0.9	0.7	0.6	0.4	0.65	0.6	0.5	0.4	0.4	0.475	0.4	0.4	0.3	0.4	0.375	1.6	1.3	1.2	1.1	1.3
13	67	75	160	0.2	0.2	0.3	0.2	0.225	0.1	0.2	0.2	0.2	0.175	0.1	0.1	0.1	0.1	0.1	0.7	0.6	0.7	0.4	0.6	0.6	0.5	0.5	0.4	0.5	0.1	0.2	0.3	0.1	0.175	1.1	2.3	1.4	1	1.45
14	68	60	160	0.3	0.4	0.5	0.3	0.375	0.3	0.3	0.2	0.2	0.25	0.1	0.1	0.1	0.1	0.1	0.8	1.1	0.9	0.7	0.875	0.7	0.8	0.8	0.7	0.75	0.2	0.5	0.5	0.5	0.425	1.5	1.2	1.1	1.1	1.225
15	69	76.4	167	0.4	0.3	0.4	0.4	0.375	0.3	0.3	0.3	0.3	0.3	0.1	0.3	0.2	0.3	0.225	0.7	0.7	0.8	1	0.8	0.5	0.3	0.6	0.8	0.55	0.4	0.4	0.3	0.4	0.375	1.7	1.5	1.5	1.6	1.575
16	72	54.3	153	0.4	0.4	0.5	0.05	0.3375	0.3	0.3	0.4	0.3	0.325	0.1	0.1	0.1	0.1	0.1	0.5	0.3	0.6	0.4	0.45	0.3	0.3	0.5	0.4	0.375	0.3	0.2	0.3	0.2	0.25	0.9	0.7	0.7	0.7	0.75
17	75	69.6	151	0.5	0.5	0.5	0.4	0.475	0.3	0.3	0.3	0.3	0.3	0.3	0.2	0.3	0.3	0.275	1.6	1.1	1.3	0.1	1.025	1.4	0.9	1.2	1	1.125	0.6	0.3	0.4	0.4	0.425	1.6	1.8	1.7	1.5	1.65
18	61	61	168	0.3	0.3	0.3	0.3	0.3	0.1	0.2	0.2	0.2	0.175	0.2	0.2	0.2	0.2	0.2	0.8	0.7	0.6	1	0.775	0.6	0.8	0.5	1	0.725	0.4	0.2	0.3	0.1	0.25	1.5	1.3	2	1.3	1.525
19	64	68	157	0.2	0.3	0.3	0.2	0.25	0.2	0.2	0.2	0.2	0.2	0.1	0.2	0.1	0.1	0.125	1.3	0.9	0.8	0.7	0.925	1.1	0.6	0.7	0.4	0.7	0.4	0.6	0.5	0.4	0.475	2.1	1.8	1.7	1.7	1.825
20	65	75.8	161	0.3	0.3	0.3	0.2	0.275	0.2	0.2	0.3	0.2	0.225	0.1	0.1	0.1	0.1	0.1	1.3	1.1	1.2	1	1.15	1.1	0.6	0.9	0.6	0.8	0.6	0.7	0.06	0.5	0.465	1.4	1.6	1.6	1.3	1.475
21	76	68.4	169	0.4	0.3	0.5	0.3	0.375	0.2	0.2	0.2	0.2	0.2	0.2	0.2	0.2	0.2	0.2	1	0.8	0.9	0.9	0.9	0.8	0.4	0.5	0.4	0.525	0.4	0.5	0.5	0.4	0.45	3.3	1.5	1.7	1.5	2
22	64	70.5	167	0.3	0.5	0.5	0.3	0.4	0.2	0.5	0.5	0.3	0.375	0.2	0.1	0.1	0.1	0.125	0.9	0.8	0.8	0.6	0.775	0.4	0.8	0.7	0.5	0.6	0.7	0.2	0.5	0.3	0.425	1.5	1.4	1.5	1.4	1.45
23	74	55.9	150	0.3	0.4	0.5	0.3	0.375	0.2	0.3	0.3	0.3	0.275	0.1	0.1	0.1	0.1	0.1	1.2	0.8	0.9	0.8	0.925	1.1	0.7	0.9	0.7	0.85	0.2	0.3	0.2	0.2	0.225	2.4	1	1.4	1	1.45
24	64	59.9	150	0.5	0.6	0.7	0.9	0.675	0.4	0.3	0.6	0.5	0.45	0.2	0.5	0.2	0.7	0.4	1.9	1.3	1.2	3	1.85	1,3	0.8	0.8	2.6	1.4	1.4	0.8	0.8	1.2	1.05	2.2	2.9	2.4	2.1	2.4
25	59	69.2	165	0.2	0.2	0.2	0.2	0.2	0.2	0.1	0.1	0.1	0.125	0.1	0.1	0.1	0.1	0.1	0.6	0.7	0.7	0.6	0.65	0.5	0.6	0.5	0.5	0.525	0.2	0.4	0.3	0.2	0.275	1.9	1.4	1.5	1.3	1.525
26	64	56.3	162	0.5	0.3	0.3	0.3	0.35	0.2	0.2	0.3	0.2	0.225	0.4	0.1	0.2	0.1	0.2	1.5	0.8	1	0.7	1	1	0.6	0.6	0.6	0.7	1	0.4	0.6	0.4	0.6	1	0.9	1	0.8	0.925
27	63	66	165	0.1	0.6	0.6	0.2	0.375	0.1	0.6	0.5	0.2	0.35	0.1	0.1	0.1	0.1	0.1	0.7	1.8	1.2	0.8	1.125	0.7	1.7	1.4	0.8	1.15	0.2	0.5	0.4	0.4	0.375	0.9	1.1	1	0.9	0.975
28	61	65.2	162	0.4	0.5	0.5	0.4	0.45	0.2	0.3	0.3	0.2	0.25	0.4	0.2	0.2	0.2	0.25	0.7	2.1	1.1	1	1.225	0.6	2	1.2	1	1.2	0.2	0.4	0.4	0.2	0.3	4.6	1.8	1.7	1.7	2.45
29	54	75	178	0.2	0.2	0.2	0.2	0.2	0.2	0.2	0.2	0.2	0.2	0.1	0.1	0.1	0.1	0.1	1.1	0.6	1	0.7	0.85	1	0.5	0.8	0.7	0.75	0.3	0.2	0.3	0.3	0.275	1.7	1.5	1.7	1.4	1.575
30	65	61.5	154	0.7	0.4	0.4	0.7	0.55	0.3	0.2	0.3	0.4	0.3	0.5	0.3	0.1	0.5	0.35	1.3	0.7	0.6	1.5	1.025	0.8	0.5	0.5	0.7	0.625	0.9	0.4	0.3	1.2	0.7	1.1	0.9	0.8	1.4	1.05
31	68	69	162	0.5	0.6	0.6	0.4	0.525	0.3	0.5	0.4	0.4	0.4	0.3	0.1	0.3	0.2	0.225	1.2	1.1	1.3	1	1.15	0.6	0.8	0.8	0.7	0.725	0.9	0.6	0.8	0.6	0.725	2	1.9	1.8	1.8	1.875
32	80	60.3	162	0.5	0.6	0.5	0.5	0.525	0.4	0.4	0.4	0.4	0.4	0.2	0.2	0.3	0.2	0.225	1.2	0.7	0.8	0.7	0.85	0.8	0.5	0.6	0.5	0.6	0.7	0.4	0.7	0.4	0.55	2.5	1	1.6	1.1	1.55
33	65	55	152	0.4	0.2	0.2	0.2	0.25	0.3	0.3	0.2	0.2	0.25	0.2	0.1	0.1	0.1	0.125	1.3	0.9	1	0.8	1	1.4	0.7	0.8	0.8	0.925	0.9	0.4	0.4	0.4	0.525	1.4	1.3	1	1	1.175
34	69	59.5	160	0.7	0.4	0.5	0.3	0.475	0.5	0.3	0.3	0.1	0.3	0.3	0.2	0.2	0.2	0.225	1.5	1	1.3	0.6	1.1	1.4	0.8	1.2	0.5	0.975	0.9	0.5	0.5	0.2	0.525	1.5	1.1	1.2	1.1	1.225
35	68	58.3	152	0.8	0.6	0.7	0.5	0.65	0.8	0.6	0.6	0.5	0.625	0.3	0.3	0.2	0.1	0.225	1.6	1	1.1	0.5	1.05	1.2	1	1	0.4	0.9	0.8	0.3	0.3	0.1	0.375	1.7	1.4	1.1	1.4	1.4
36	63	55.4	165	0.5	0.4	0.3	0.2	0.35	0.3	0.2	0.2	0.2	0.225	0.2	0.1	0.1	0.1	0.125	1.1	0.6	0.4	0.3	0.6	1	0.6	0.3	0.2	0.525	0.4	0.2	0.2	0.1	0.225	1.8	1.2	1.2	0.8	1.25
	OSI - overal stability index
	APSI - anterio posterior stability index
	MLSI - medio lateral stability index
	FRI - fall risk index
